# Supplementary material
Source: PubMed Central journal article supplement (PMC6445165)
Supplement: IENZ_A_1326915_SM4174.pdf [file IENZ_A_1326915_SM4174.pdf]

## SUPPLEMENTAL MATERIAL FOR

### **Isoxazol-5(2H)-one: a new scaffold for potent human neutrophil elastase (HNE) inhibitors**

*Claudia Vergelli<sup>a</sup>, Igor A. Schepetkin<sup>b</sup>, Letizia Crocetti<sup>a\*</sup>, Antonella Iacovone<sup>a</sup>, Maria Paola Giovannoni<sup>a</sup>, Gabriella Guerrini<sup>a</sup>, Andrei I. Khlebnikov<sup>c</sup>, Samuele Ciattini<sup>d</sup>, Giovanna Ciciani<sup>a</sup>, Mark T. Quinn<sup>b</sup>*

<sup>a</sup>NEUROFARBA, Sezione di Farmaceutica e Nutraceutica, Università degli Studi di Firenze, Via Ugo Schiff 6, 50019 Sesto Fiorentino, Italy.

<sup>2</sup>Department of Microbiology and Immunology, Montana State University, Bozeman, MT 59717, USA.

<sup>c</sup>Department of Biotechnology and Organic Chemistry, Tomsk Polytechnic University, Tomsk 634050, Russia and Department of Chemistry, Altai State Technical University, Barnaul, Russia.

<sup>d</sup>Dipartimento di Chimica, Centro di Cristallografia, Università degli Studi di Firenze, Via della Lastruccia 3, 50019 Sesto Fiorentino, Italy.

#### **Table of contents**

1. <sup>1</sup>H-NMR, <sup>13</sup>C-NMR, HMBC and HSQC spectra of compounds **2a**, **2d**, **2e**, **2n**, **2s**, **4a** and **4c**.
2. Crystal data and structure refinement for **2j** (**Table S1**)
3. Atomic coordinates (x 10<sup>4</sup>) and equivalent isotropic displacement parameters (Å<sup>2</sup> x 10<sup>3</sup>) for **2j** (**Table S2**)
4. Anisotropic displacement parameters (Å<sup>2</sup> x 10<sup>3</sup>) for **2j** (**Table S3**)
5. Hydrogen coordinates (x 10<sup>4</sup>) and isotropic displacement parameters (Å<sup>2</sup> x 10<sup>3</sup>) for **2j** (**Table S4**)
6. Molecular formula strings (**Table S5**)
7. Elemental analysis (**Table S6**)

Compound 2a

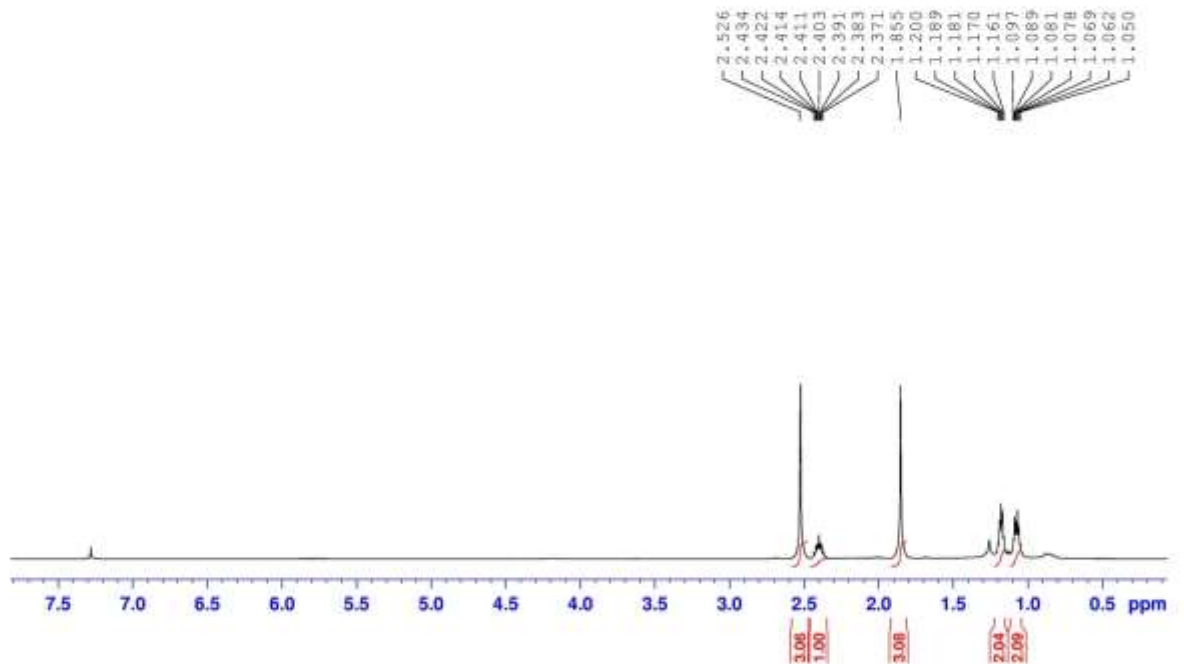

<sup>13</sup>C Comp. 2a

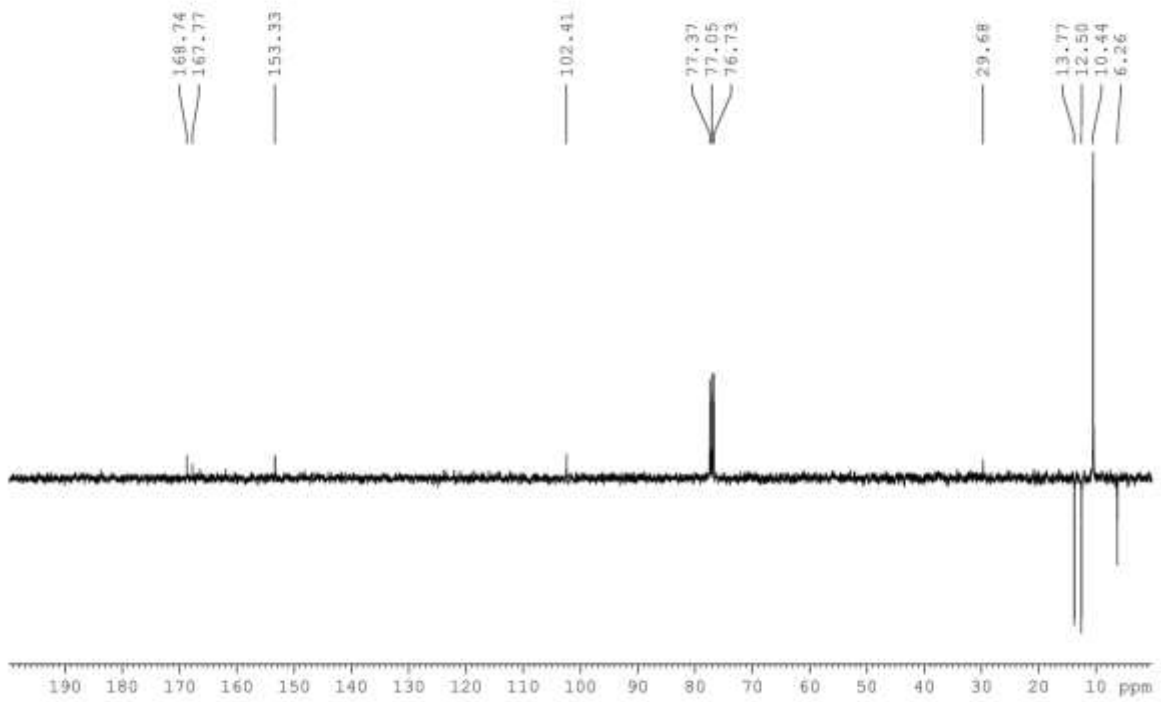

HMBC Comp. 2a

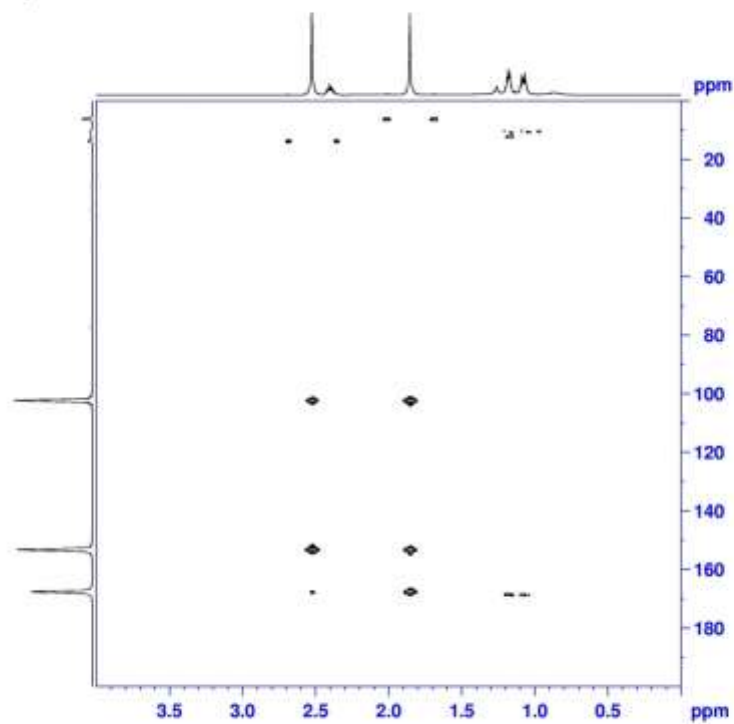

HSQC Comp. 2a

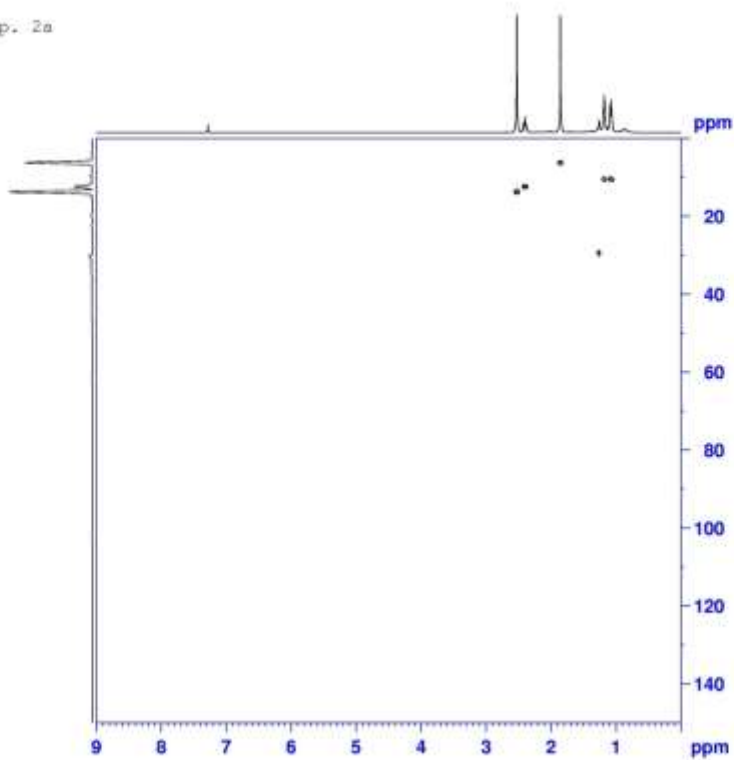

Compound 2d

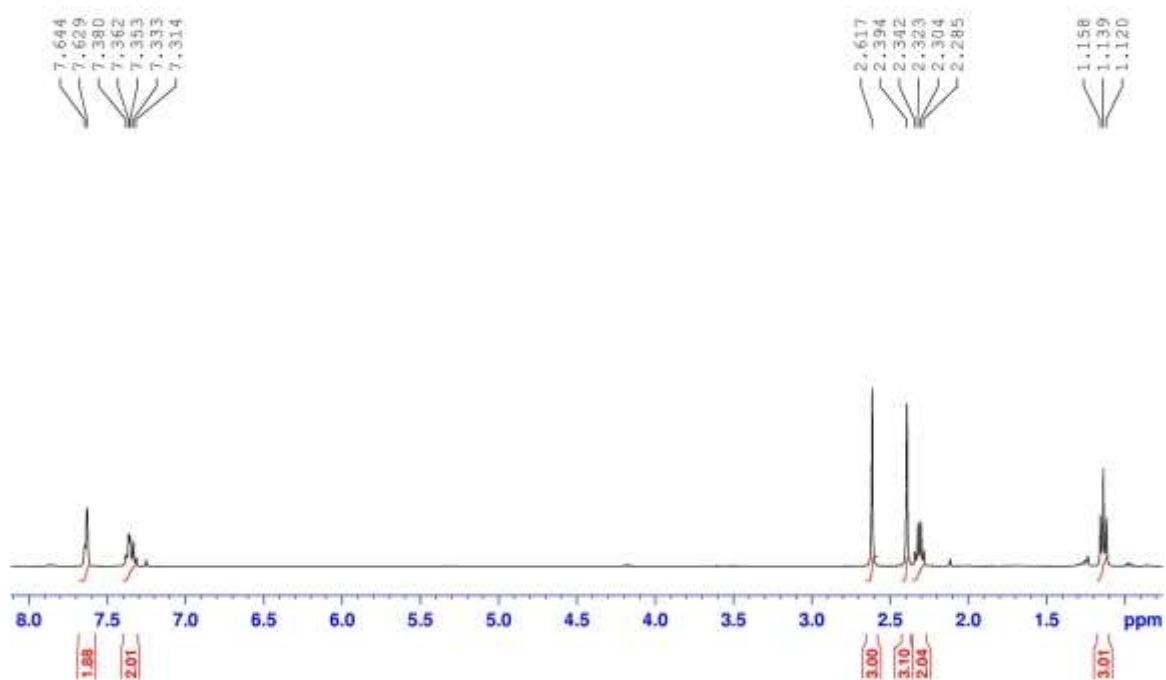

<sup>13</sup>C Comp. 2d

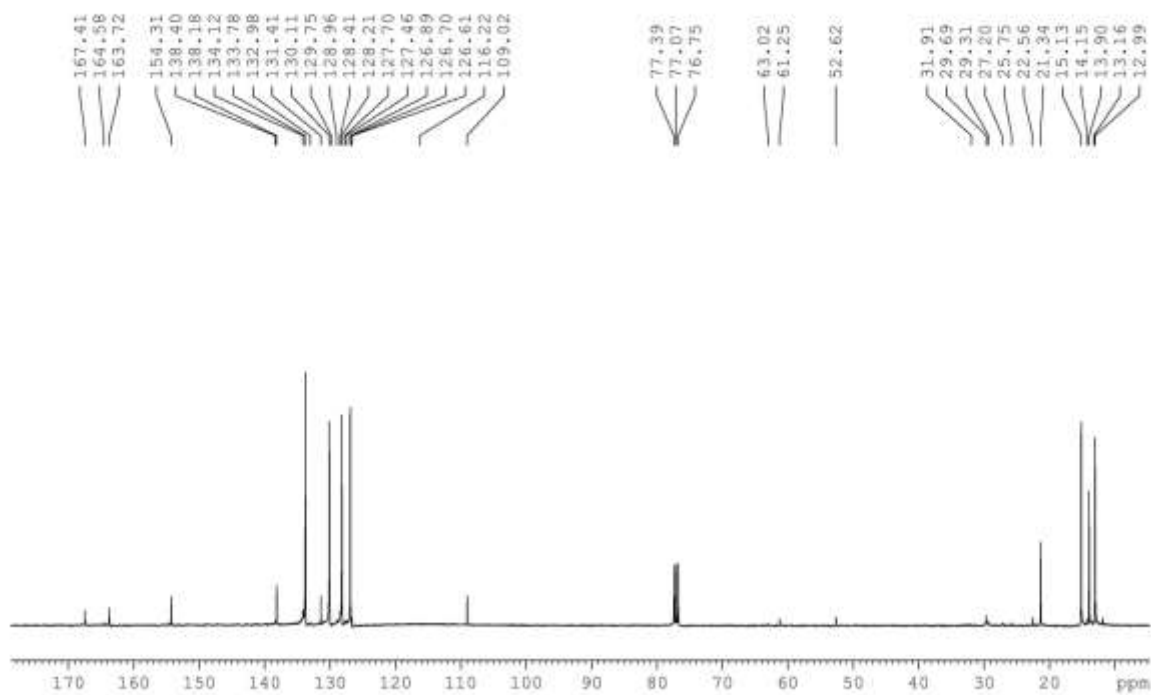

HMBC Comp. 2d

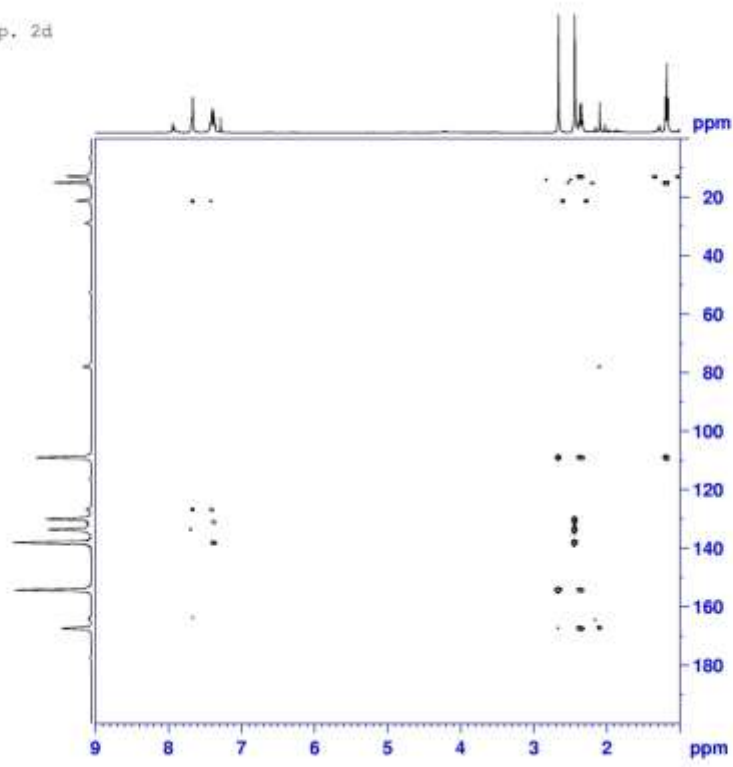

HSQC Comp. 2d

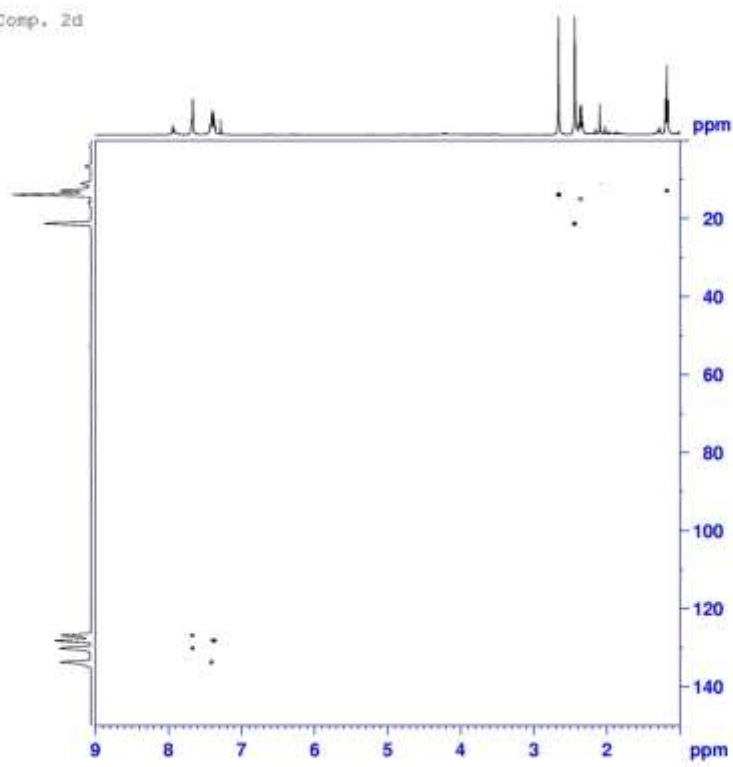

Compound 2e

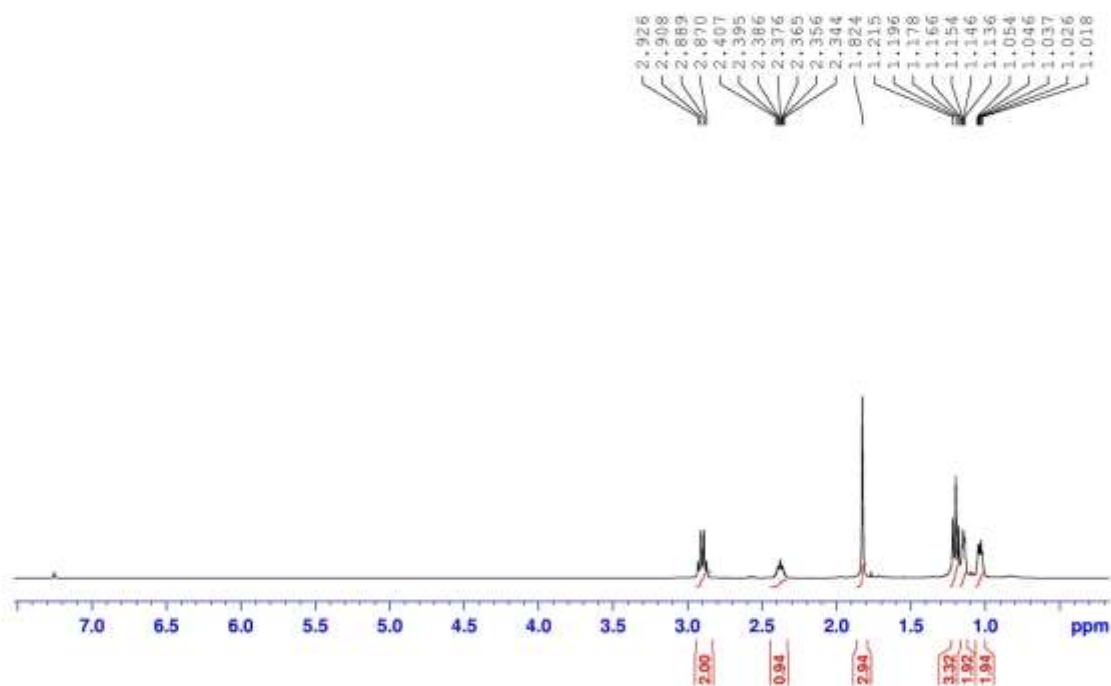

Compound 2e

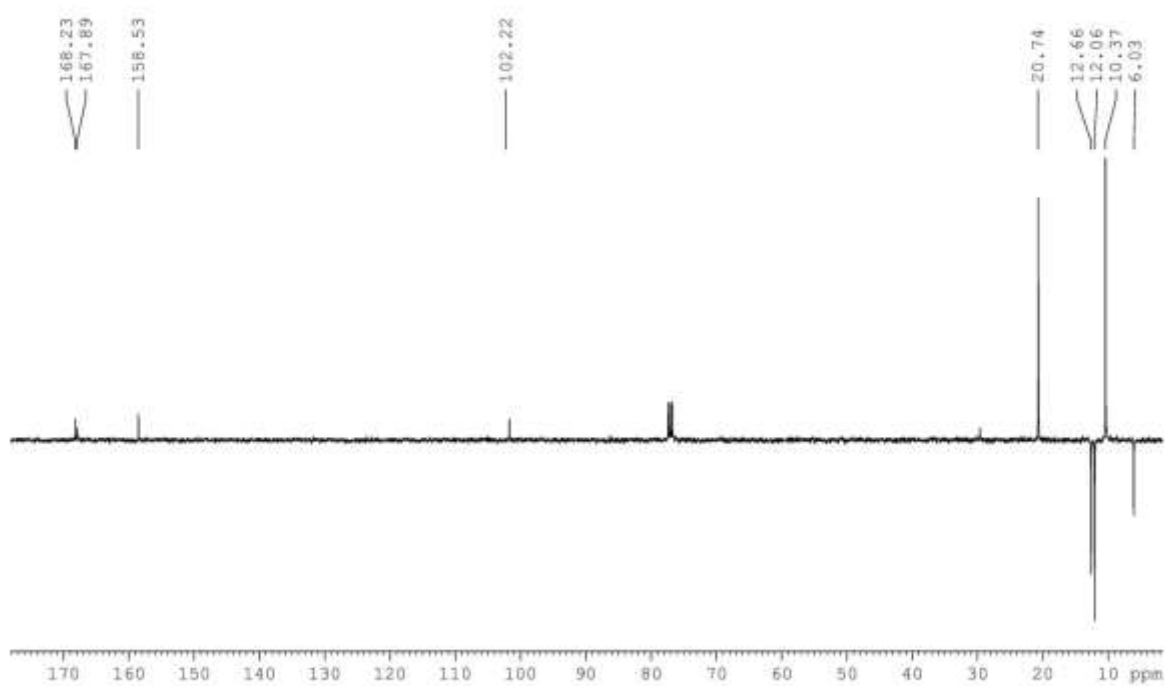

HMBC Comp. 2e

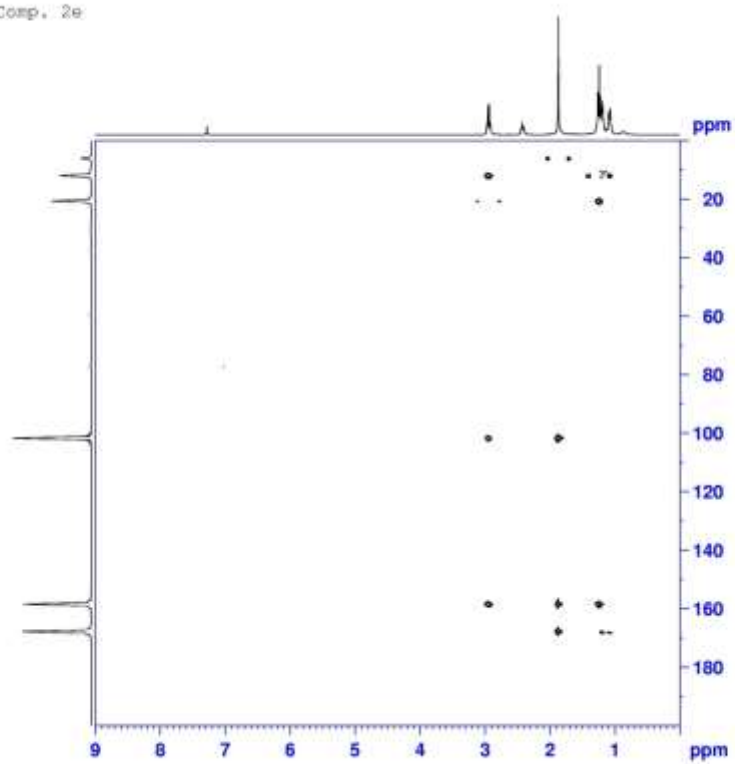

H5QC comp. 2e

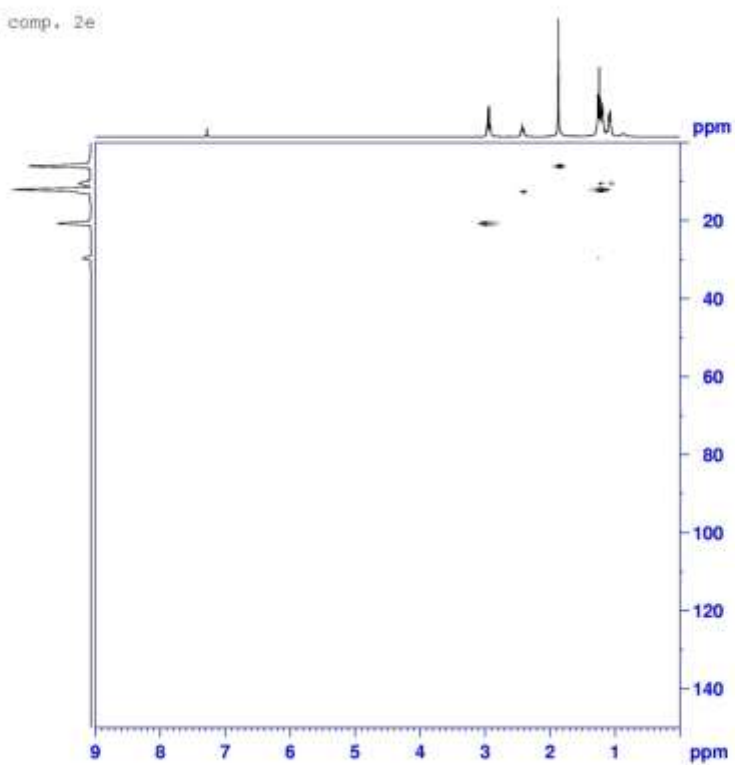

Compound 2n

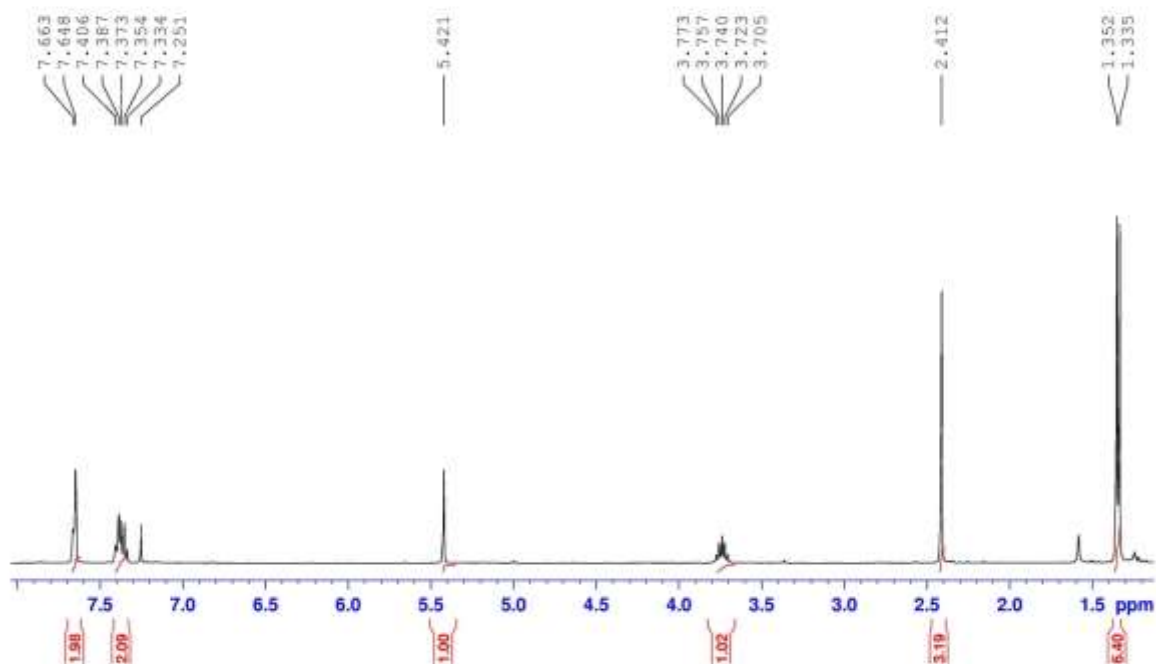

<sup>13</sup>C Comp. 2n

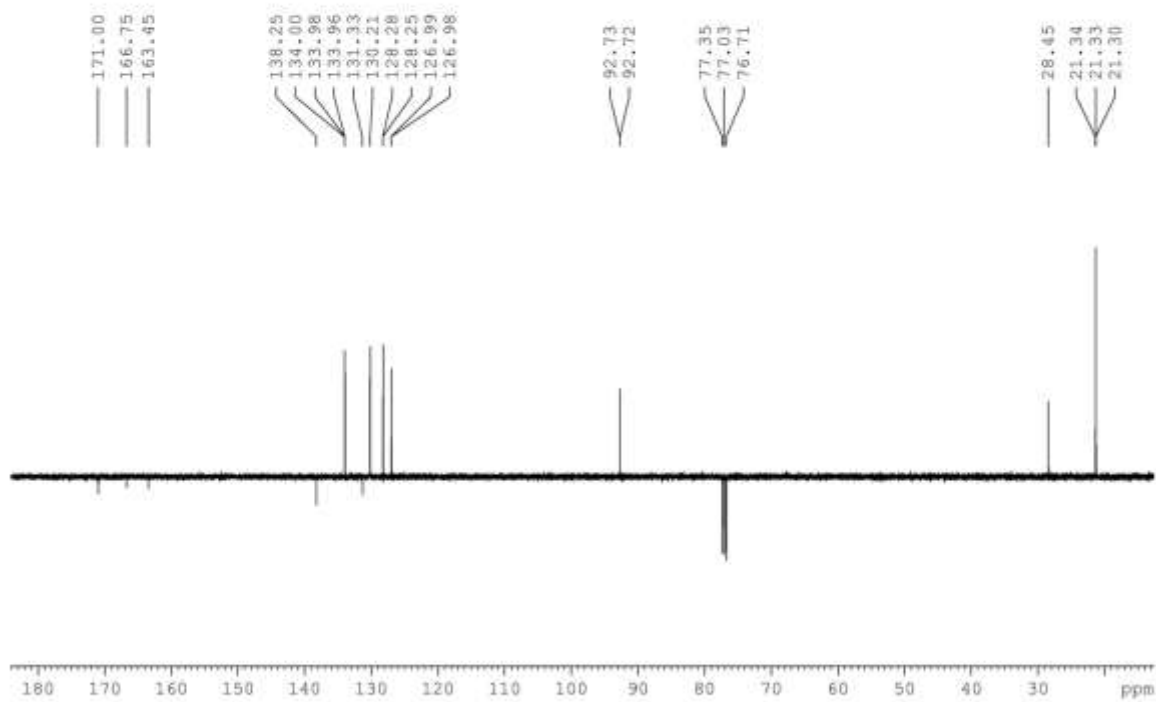



HMBC Comp. 2n

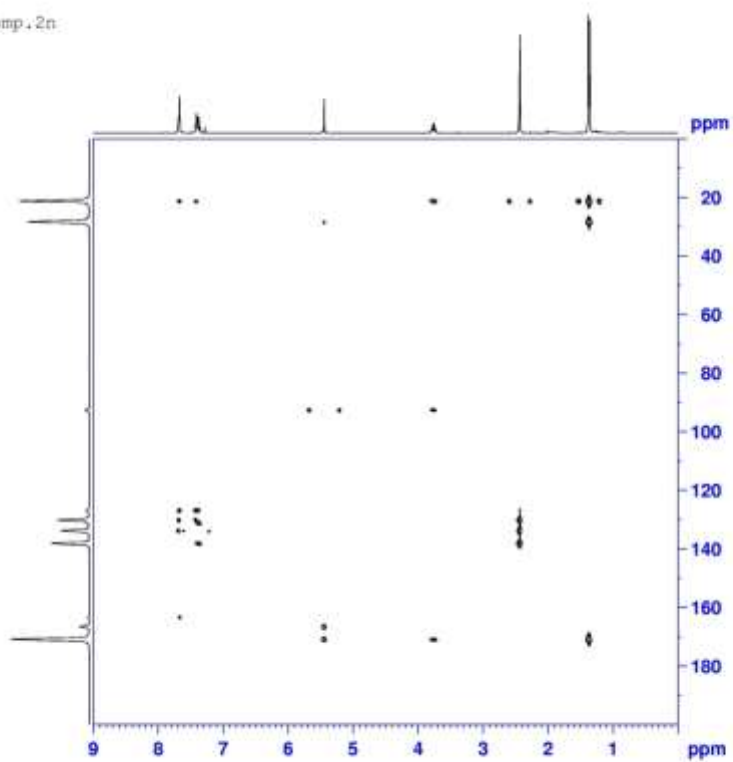

HSQC Comp. 2n

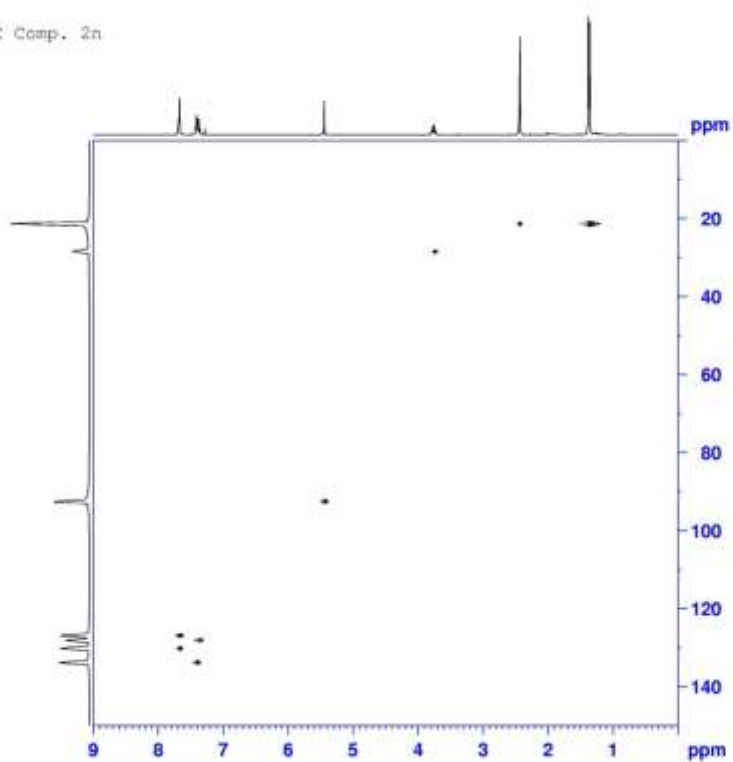

Compound 2a

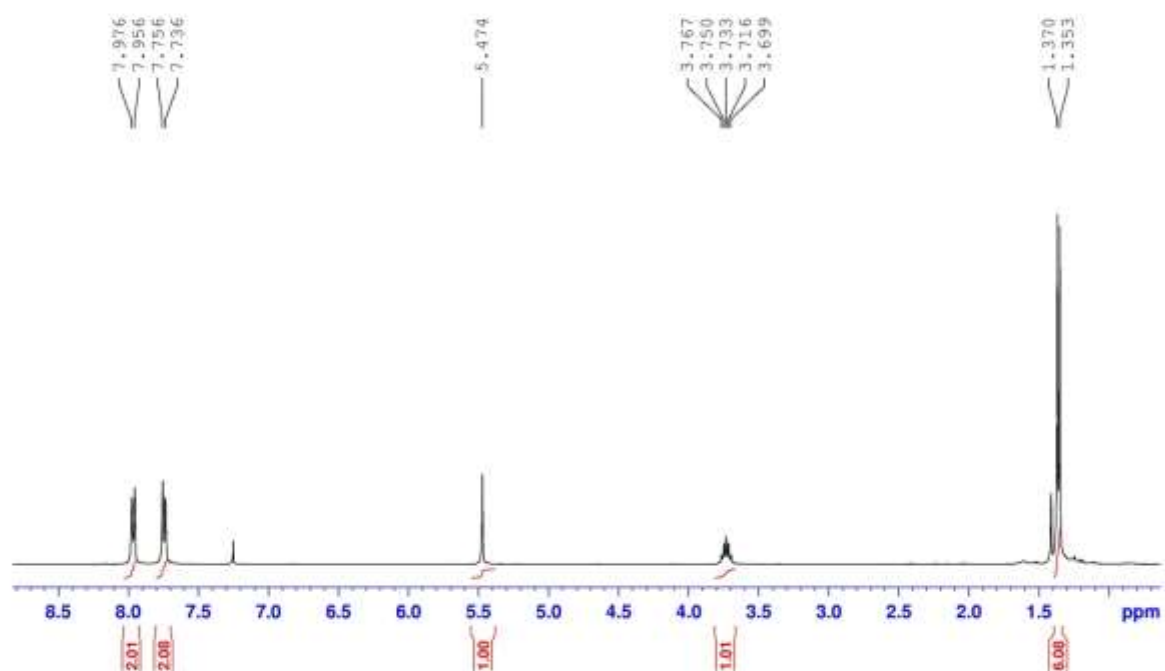

<sup>13</sup>C Comp. 2a

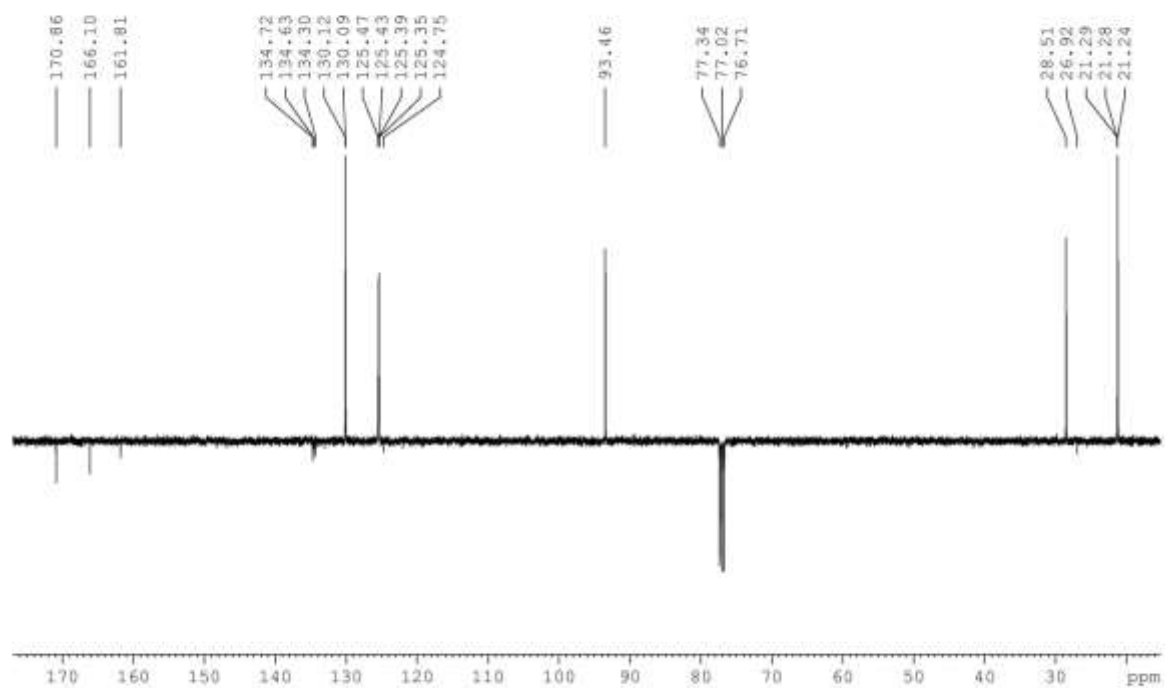

HMBC Comp. 2a

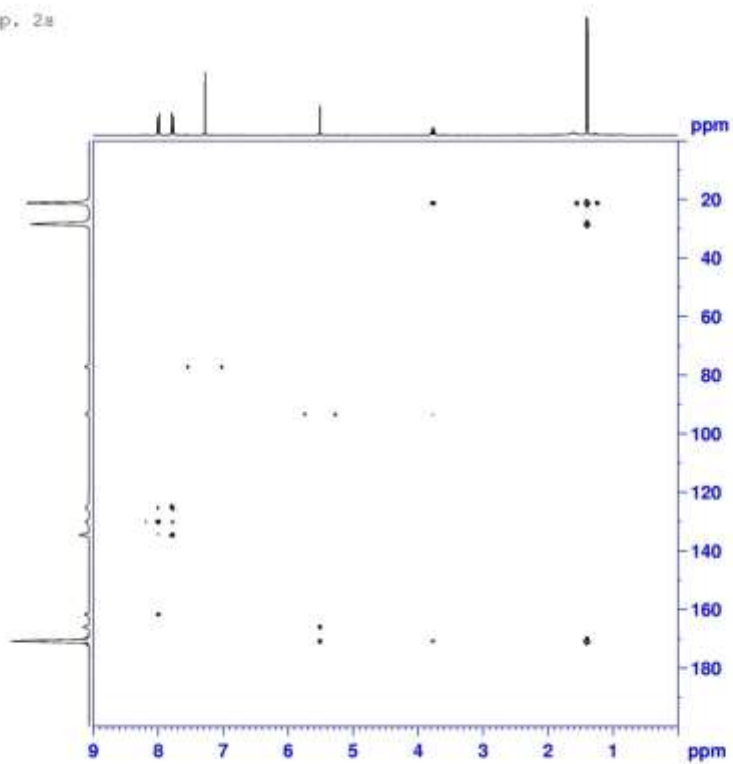

HSQC Comp. 2a

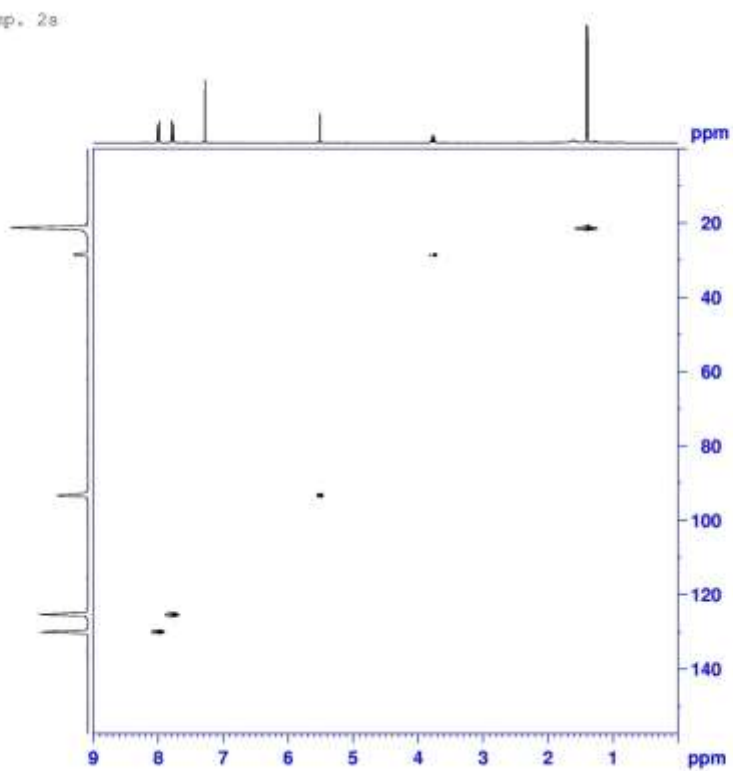

Compound 4a

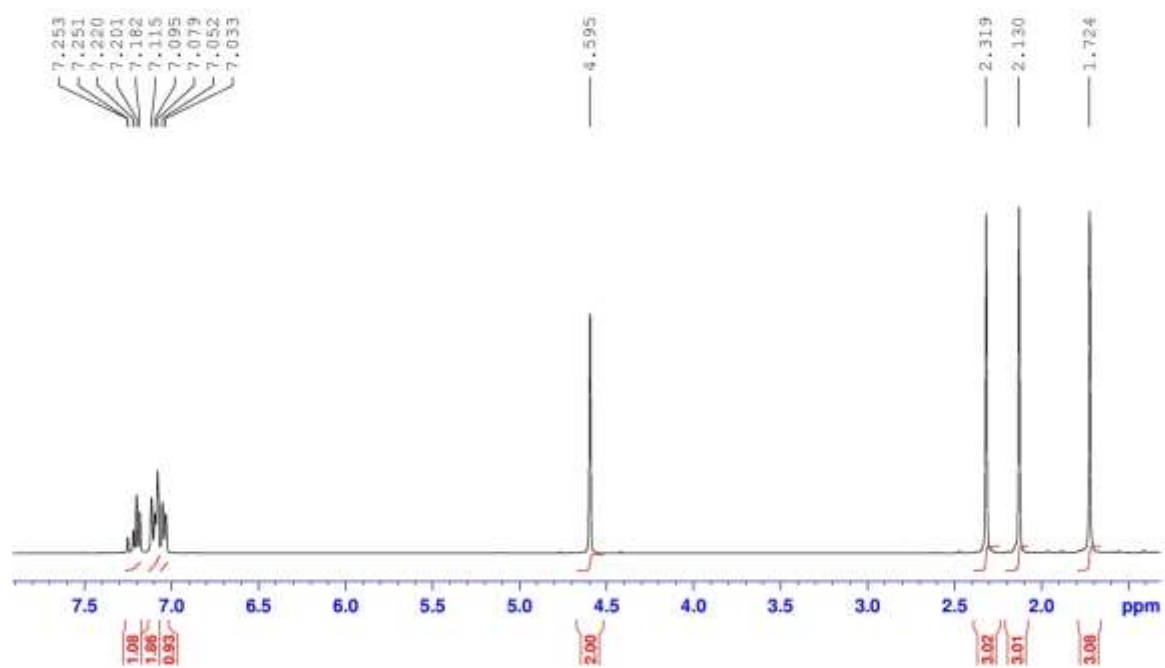

<sup>13</sup>C Comp. 4a

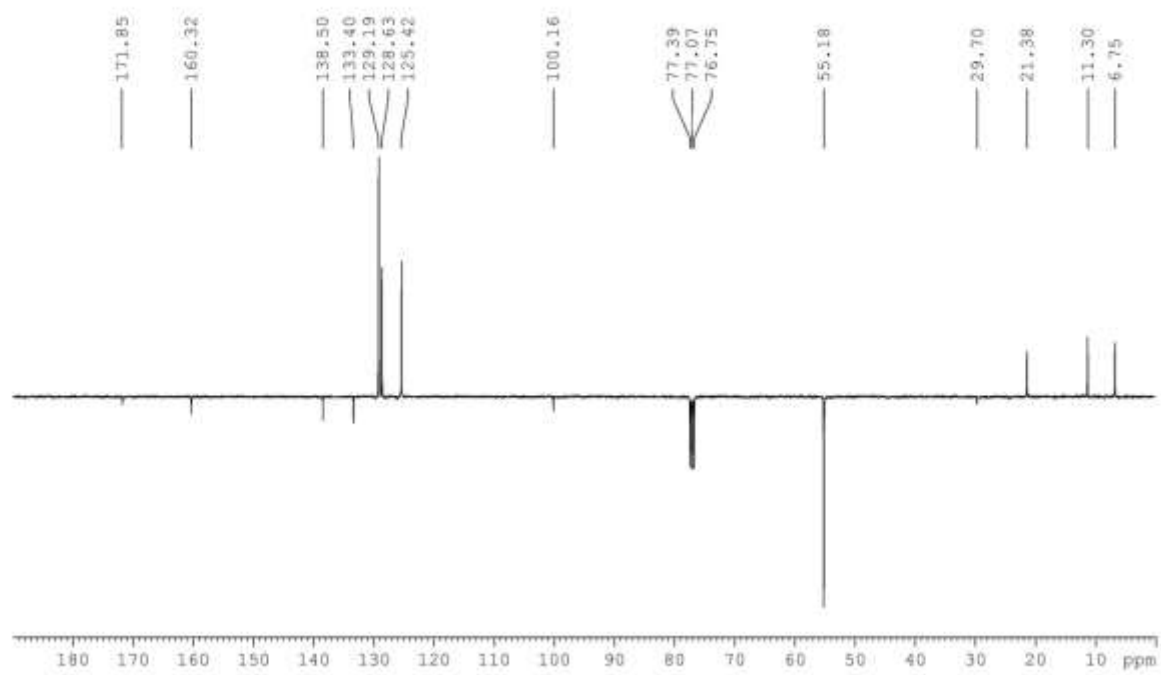

HMBC Comp. 4a

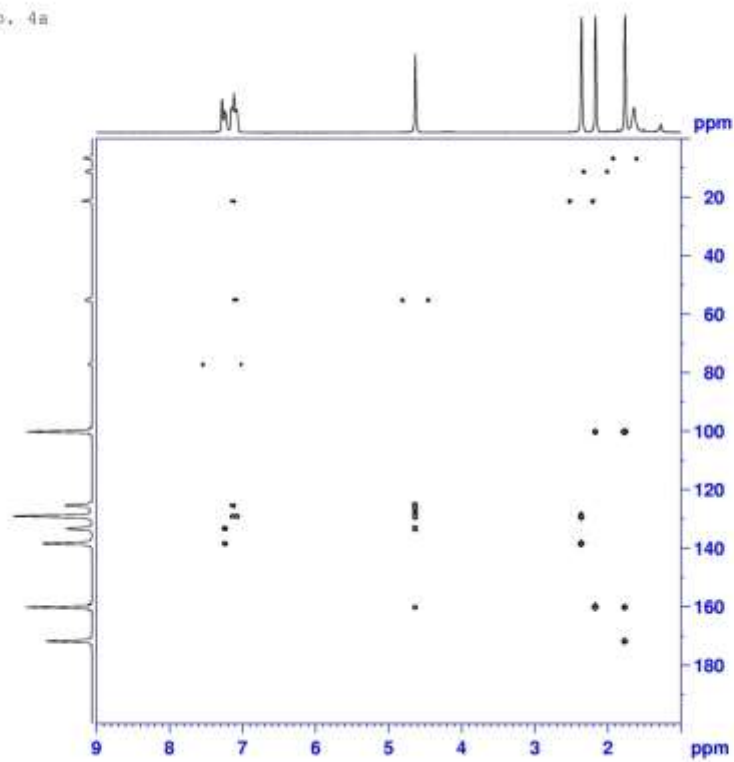

HSQC Comp. 4a

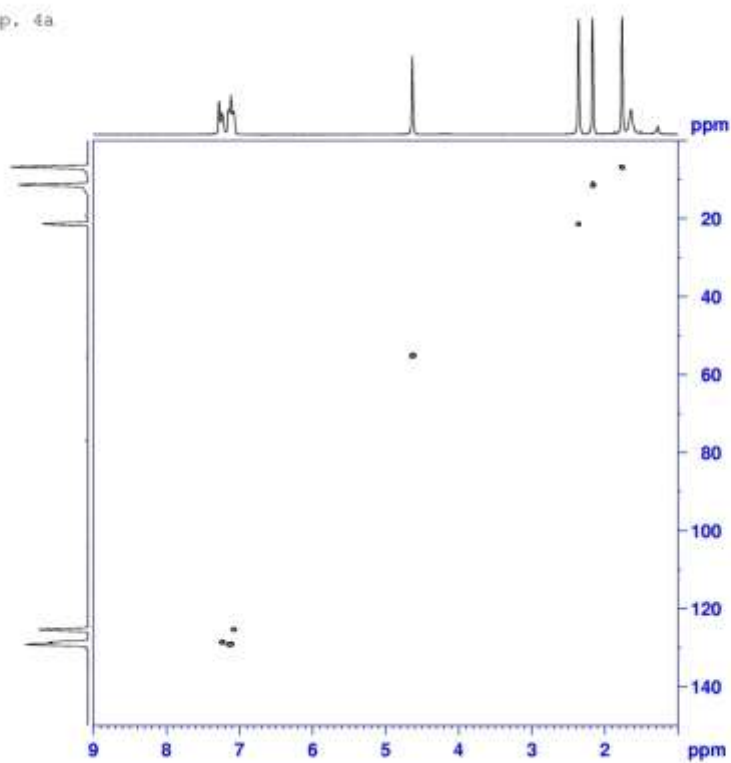

Compound 4c

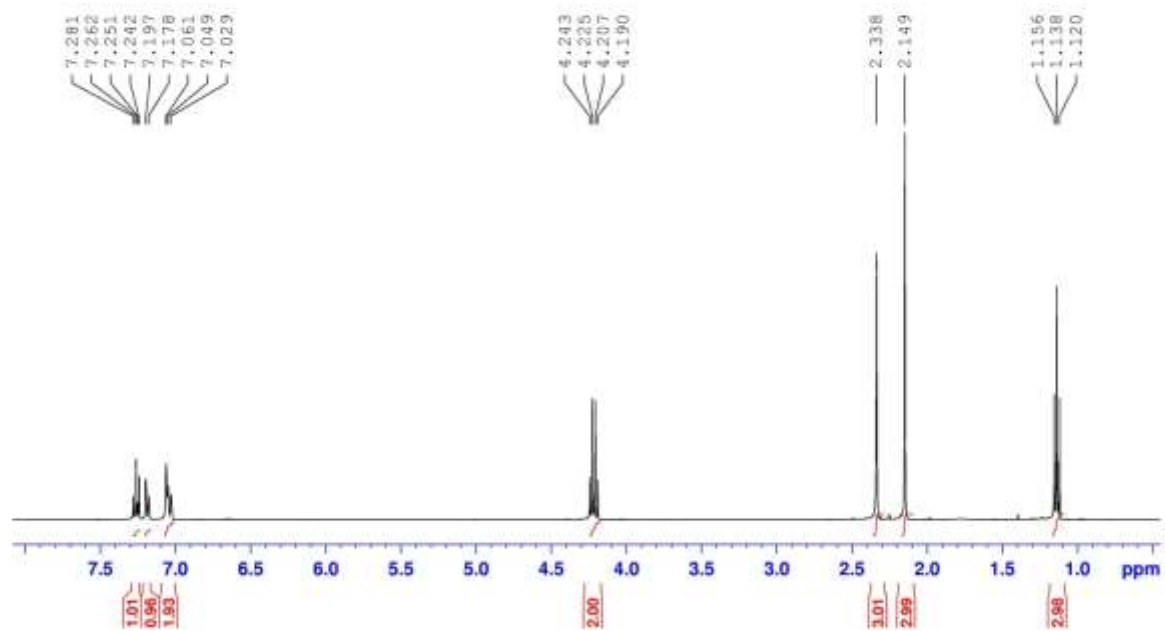

<sup>13</sup>C Comp. 4c

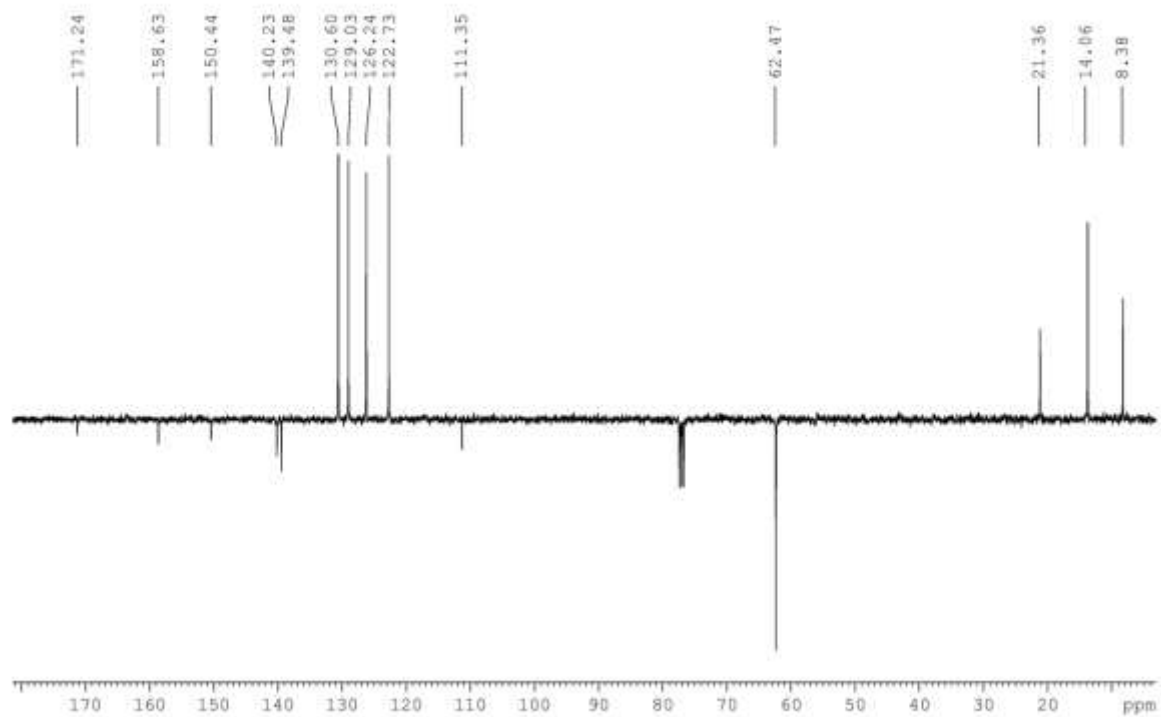

HMBC Comp. 4c

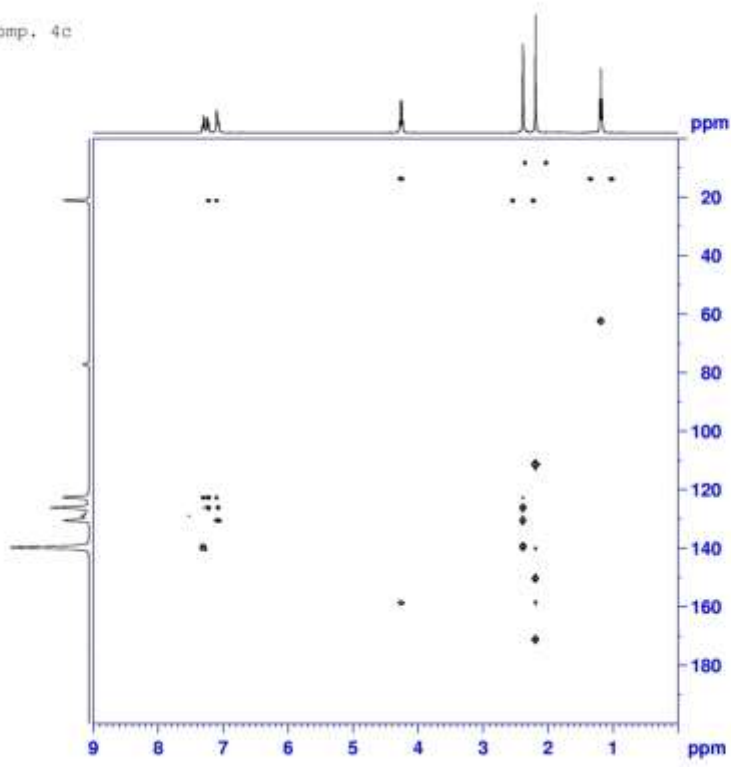

HMQC Comp. 4c

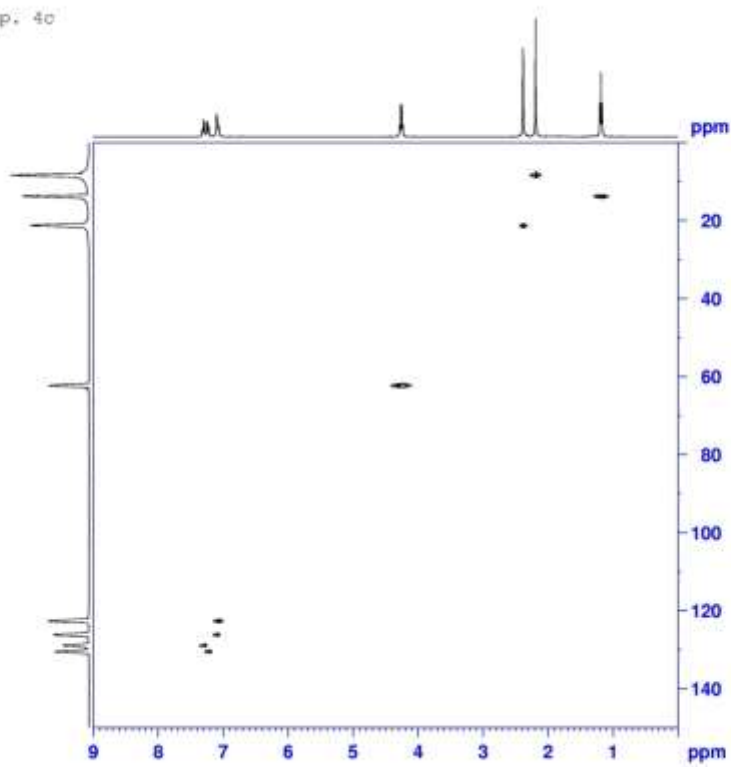

**Table S1.** Crystal data and structure refinement for **2j**

|                                   |                                                                                                                |
|-----------------------------------|----------------------------------------------------------------------------------------------------------------|
| Empirical formula                 | C <sub>13</sub> H <sub>13</sub> N O <sub>3</sub>                                                               |
| Formula weight                    | 231.24                                                                                                         |
| Temperature                       | 298(2) K                                                                                                       |
| Wavelength                        | 1.54184 Å                                                                                                      |
| Crystal system                    | Monoclinic                                                                                                     |
| space group                       | P 21/c                                                                                                         |
| Unit cell dimensions              | a = 9.7480(2) Å    alpha = 90°.<br>b = 14.0846(3) Å    beta = 91.372(2)°.<br>c = 8.10170(10) Å    gamma = 90°. |
| Volume                            | 1112.02(4) Å <sup>3</sup>                                                                                      |
| Z                                 | 4                                                                                                              |
| Calculated density                | 1.381 Mg/m <sup>3</sup>                                                                                        |
| Absorption coefficient            | 0.814 mm <sup>-1</sup>                                                                                         |
| F(000)                            | 488                                                                                                            |
| Crystal size                      | 0.35 x 0.25 x 0.22 mm                                                                                          |
| Theta range for data collection   | 5.520 to 72.227 deg.                                                                                           |
| Limiting indices                  | -11 ≤ h ≤ 11, -16 ≤ k ≤ 16, -9 ≤ l ≤ 7                                                                         |
| Reflections collected / unique    | 6174 / 2114 [R(int) = 0.0276]                                                                                  |
| Completeness to theta =           | 70.000    98.9 %                                                                                               |
| Refinement method                 | Full-matrix least-squares on F <sup>2</sup>                                                                    |
| Data / restraints / parameters    | 2114 / 0 / 206                                                                                                 |
| Goodness-of-fit on F <sup>2</sup> | 1.100                                                                                                          |
| Final R indices [I > 2σ(I)]       | R1 = 0.0386, wR2 = 0.0937                                                                                      |
| R indices (all data)              | R1 = 0.0498, wR2 = 0.1017                                                                                      |
| Largest diff. peak and hole       | 0.203 and -0.349 e.Å <sup>-3</sup>                                                                             |



**Table S2.** Atomic coordinates ( $\times 10^4$ ) and equivalent isotropic displacement parameters ( $\text{\AA}^2 \times 10^3$ ) for **2j**.

U(eq) is defined as one third of the trace of the orthogonalized Uij tensor.

---

|       | x        | y       | z        | U(eq) |
|-------|----------|---------|----------|-------|
| O(2)  | 6704(1)  | 281(1)  | 6209(1)  | 18(1) |
| O(1)  | 5491(1)  | 2160(1) | 3730(1)  | 23(1) |
| O(3)  | 6653(1)  | -709(1) | 8385(1)  | 24(1) |
| N(1)  | 5853(1)  | 1020(1) | 5617(2)  | 17(1) |
| C(11) | 4713(2)  | 1092(1) | 6603(2)  | 16(1) |
| C(7)  | 7569(2)  | 1417(1) | 1733(2)  | 17(1) |
| C(6)  | 7577(2)  | 1316(1) | 3453(2)  | 17(1) |
| C(8)  | 6254(2)  | 1539(1) | 4246(2)  | 17(1) |
| C(10) | 4841(2)  | 449(1)  | 7829(2)  | 18(1) |
| C(2)  | 8764(2)  | 1304(1) | 852(2)   | 18(1) |
| C(1)  | 8748(2)  | 1380(1) | -1000(2) | 21(1) |
| C(5)  | 8800(2)  | 1117(1) | 4310(2)  | 19(1) |
| C(4)  | 10004(2) | 1029(1) | 3435(2)  | 20(1) |
| C(3)  | 9987(2)  | 1117(1) | 1732(2)  | 20(1) |
| C(12) | 3570(2)  | 1767(1) | 6219(2)  | 19(1) |
| C(9)  | 6082(2)  | -75(1)  | 7639(2)  | 18(1) |
| C(13) | 2370(2)  | 1628(1) | 7372(2)  | 25(1) |

---

**Table S3.** Anisotropic displacement parameters ( $\text{\AA}^2 \times 10^3$ ) for **2j**.

The anisotropic displacement factor exponent takes the form:

$$-2 \pi^2 [ h^2 a^{*2} U_{11} + \dots + 2 h k a^* b^* U_{12} ]$$

---

|       | U11   | U22   | U33   | U23   | U13   | U12   |
|-------|-------|-------|-------|-------|-------|-------|
| O(2)  | 19(1) | 17(1) | 18(1) | 4(1)  | 2(1)  | 3(1)  |
| O(1)  | 23(1) | 24(1) | 22(1) | 6(1)  | 2(1)  | 6(1)  |
| O(3)  | 23(1) | 25(1) | 24(1) | 9(1)  | 2(1)  | 2(1)  |
| N(1)  | 17(1) | 16(1) | 17(1) | 3(1)  | 2(1)  | 4(1)  |
| C(11) | 17(1) | 17(1) | 16(1) | -6(1) | 1(1)  | -3(1) |
| C(7)  | 18(1) | 13(1) | 19(1) | 1(1)  | 0(1)  | -2(1) |
| C(6)  | 18(1) | 13(1) | 19(1) | 0(1)  | 2(1)  | -2(1) |
| C(8)  | 20(1) | 16(1) | 14(1) | -1(1) | -1(1) | -1(1) |
| C(10) | 18(1) | 20(1) | 17(1) | 0(1)  | 1(1)  | -2(1) |
| C(2)  | 22(1) | 13(1) | 18(1) | -1(1) | 3(1)  | -2(1) |
| C(1)  | 27(1) | 19(1) | 18(1) | -1(1) | 5(1)  | -1(1) |
| C(5)  | 21(1) | 17(1) | 19(1) | 2(1)  | -1(1) | -1(1) |
| C(4)  | 16(1) | 20(1) | 25(1) | 2(1)  | -2(1) | -1(1) |
| C(3)  | 19(1) | 17(1) | 24(1) | 0(1)  | 5(1)  | 0(1)  |
| C(12) | 19(1) | 18(1) | 20(1) | -2(1) | 1(1)  | 2(1)  |
| C(9)  | 20(1) | 19(1) | 15(1) | 0(1)  | 0(1)  | -3(1) |
| C(13) | 21(1) | 26(1) | 29(1) | 1(1)  | 6(1)  | 6(1)  |

---

**Table S4.** Hydrogen coordinates ( $\times 10^4$ ) and isotropic displacement parameters ( $\text{\AA}^2 \times 10^3$ ) for **2j**

---

|        | x         | y        | z         | U(eq) |
|--------|-----------|----------|-----------|-------|
| H(13A) | 2660(19)  | 1727(13) | 8570(20)  | 31(5) |
| H(12A) | 3923(17)  | 2399(12) | 6310(20)  | 18(4) |
| H(5)   | 8815(17)  | 1068(12) | 5520(20)  | 23(4) |
| H(13B) | 1972(18)  | 972(13)  | 7280(20)  | 23(4) |
| H(12B) | 3267(17)  | 1659(12) | 5030(20)  | 23(4) |
| H(7)   | 6710(18)  | 1564(12) | 1150(20)  | 21(4) |
| H(3)   | 10836(19) | 1044(13) | 1140(20)  | 30(5) |
| H(10)  | 4214(19)  | 365(13)  | 8720(20)  | 27(5) |
| H(4)   | 10859(19) | 917(13)  | 4040(20)  | 27(5) |
| H(13C) | 1655(19)  | 2086(13) | 7100(20)  | 28(5) |
| H(1B)  | 9430(20)  | 1858(15) | -1360(30) | 40(6) |
| H(1C)  | 7790(20)  | 1580(13) | -1440(20) | 34(5) |
| H(1A)  | 8980(20)  | 770(15)  | -1510(20) | 36(5) |

---

**Table S5.** Molecular formula strings

| compd_ID | SMILES                                                     |
|----------|------------------------------------------------------------|
| 2a       | <chem>CC(N(C(C1CC1)=O)O2)=C(C)C2=O</chem>                  |
| 2b       | <chem>CC(N(C(C1=CC=CC(C)=C1)=O)O2)=C(C)C2=O</chem>         |
| 2c       | <chem>CC1=C(CC)N(C(C2CC2)=O)OC1=O</chem>                   |
| 2d       | <chem>CC(N(C(C1=CC=CC(C)=C1)=O)O2)=C(CC)C2=O</chem>        |
| 2e       | <chem>O=C1ON(C(C2CC2)=O)C(CC)=C1</chem>                    |
| 2f       | <chem>CC1=C(CC)N(C(C2=CC=CC(C)=C2)=O)OC1=O</chem>          |
| 2g       | <chem>O=C1ON(C(C2CC2)=O)C(C(OCC)=O)=C1C</chem>             |
| 2h       | <chem>O=C1ON(C(C2=CC=CC(C)=C2)=O)C(C(OCC)=O)=C1C</chem>    |
| 3a       | <chem>S=C1ON(C(C2CC2)=O)C(C(C)C)=C1</chem>                 |
| 3b       | <chem>S=C1ON(C(C2=CC=CC(C)=C2)=O)C(C(C)C)=C1</chem>        |
| 2i       | <chem>O=C1ON(C(C2CC2)=O)C(CC)=C1</chem>                    |
| 2j       | <chem>O=C1ON(C(C2=CC=CC(C)=C2)=O)C(CC)=C1</chem>           |
| 2k       | <chem>O=C1ON(C(CC)=O)C(C(C)C)=C1</chem>                    |
| 2l       | <chem>O=C1ON(C(C2CC2)=O)C(C(C)C)=C1</chem>                 |
| 2m       | <chem>O=C1ON(C(C2CCCC2)=O)C(C(C)C)=C1</chem>               |
| 2n       | <chem>O=C1ON(C(C2=CC=CC(C)=C2)=O)C(C(C)C)=C1</chem>        |
| 2o       | <chem>O=C1ON(C(C2=CC=C(C)C=C2)=O)C(C(C)C)=C1</chem>        |
| 2p       | <chem>O=C1ON(C(C2=CC=CC(C#N)=C2)=O)C(C(C)C)=C1</chem>      |
| 2q       | <chem>O=C1ON(C(C2=CC=C(C#N)C=C2)=O)C(C(C)C)=C1</chem>      |
| 2r       | <chem>O=C1ON(C(C2=CC=CC(C(F)(F)F)=C2)=O)C(C(C)C)=C1</chem> |
| 2s       | <chem>O=C1ON(C(C2=CC=C(C(F)(F)F)C=C2)=O)C(C(C)C)=C1</chem> |
| 4a       | <chem>CC(N(CC1=CC=CC=C1)O2)=C(C)C2=O</chem>                |
| 4b       | <chem>O=C1ON(CC2=CC=CC(C)=C2)C(C(C)C)=C1</chem>            |
| 4c       | <chem>CC1=C(C(OCC)=O)N(C2=CC=CC(C)=C2)OC1=O</chem>         |

**Table S6.** Elemental analysis

| Comp.     | Formula (MW)                                                            | Anal. Calcd. |      |       | Anal. Found |      |       |
|-----------|-------------------------------------------------------------------------|--------------|------|-------|-------------|------|-------|
|           |                                                                         | C            | H    | N     | C           | H    | N     |
| <b>2a</b> | C <sub>9</sub> H <sub>11</sub> NO <sub>3</sub> (181.19)                 | 59.66        | 6.12 | 7.33  | 59.89       | 6.14 | 7.76  |
| <b>2b</b> | C <sub>13</sub> H <sub>13</sub> NO <sub>3</sub> (231.25)                | 67.52        | 5.67 | 6.06  | 67.79       | 5.69 | 6.08  |
| <b>2c</b> | C <sub>10</sub> H <sub>13</sub> NO <sub>3</sub> (195.22)                | 61.53        | 6.71 | 7.18  | 61.77       | 6.73 | 7.20  |
| <b>2d</b> | C <sub>14</sub> H <sub>15</sub> NO <sub>3</sub> (245.27)                | 68.56        | 6.16 | 5.71  | 68.83       | 6.18 | 5.73  |
| <b>2e</b> | C <sub>10</sub> H <sub>13</sub> NO <sub>3</sub> (195.22)                | 61.53        | 6.71 | 7.18  | 61.77       | 6.73 | 7.20  |
| <b>2f</b> | C <sub>14</sub> H <sub>15</sub> NO <sub>3</sub> (245.27)                | 68.56        | 6.16 | 5.71  | 68.83       | 6.18 | 5.73  |
| <b>2g</b> | C <sub>11</sub> H <sub>13</sub> NO <sub>5</sub> (239.22)                | 55.23        | 5.48 | 5.86  | 55.45       | 5.50 | 5.88  |
| <b>2h</b> | C <sub>15</sub> H <sub>15</sub> NO <sub>5</sub> (289.28)                | 62.28        | 5.23 | 4.84  | 62.52       | 5.25 | 4.85  |
| <b>2i</b> | C <sub>9</sub> H <sub>11</sub> NO <sub>3</sub> (181.19)                 | 59.66        | 6.12 | 7.33  | 59.89       | 6.14 | 7.76  |
| <b>2j</b> | C <sub>13</sub> H <sub>13</sub> NO <sub>3</sub> (231.25)                | 67.52        | 5.67 | 6.06  | 67.79       | 5.69 | 6.08  |
| <b>2k</b> | C <sub>9</sub> H <sub>13</sub> NO <sub>3</sub> (183.20)                 | 59.00        | 7.15 | 7.65  | 59.23       | 7.17 | 7.68  |
| <b>2l</b> | C <sub>10</sub> H <sub>13</sub> NO <sub>3</sub> (195.22)                | 61.53        | 6.71 | 7.18  | 61.77       | 6.73 | 7.20  |
| <b>2m</b> | C <sub>12</sub> H <sub>17</sub> NO <sub>3</sub> (223.27)                | 64.55        | 7.67 | 6.27  | 64.80       | 7.70 | 6.29  |
| <b>2n</b> | C <sub>14</sub> H <sub>15</sub> NO <sub>3</sub> (245.27)                | 68.56        | 6.16 | 5.71  | 68.83       | 6.18 | 5.73  |
| <b>2o</b> | C <sub>14</sub> H <sub>15</sub> NO <sub>3</sub> (245.27)                | 68.56        | 6.16 | 5.71  | 68.83       | 6.18 | 5.73  |
| <b>2p</b> | C <sub>14</sub> H <sub>12</sub> N <sub>2</sub> O <sub>3</sub> (256.26)  | 65.62        | 4.72 | 10.93 | 65.88       | 4.73 | 10.97 |
| <b>2q</b> | C <sub>14</sub> H <sub>12</sub> N <sub>2</sub> O <sub>3</sub> (256.26)  | 65.62        | 4.72 | 10.93 | 65.88       | 4.73 | 10.97 |
| <b>2r</b> | C <sub>14</sub> H <sub>12</sub> F <sub>3</sub> NO <sub>3</sub> (299.25) | 56.19        | 4.04 | 4.68  | 56.41       | 4.05 | 4.69  |
| <b>2s</b> | C <sub>14</sub> H <sub>12</sub> F <sub>3</sub> NO <sub>3</sub> (299.25) | 56.19        | 4.04 | 4.68  | 56.41       | 4.05 | 4.69  |

|           |                                                            |       |      |      |  |       |      |      |
|-----------|------------------------------------------------------------|-------|------|------|--|-------|------|------|
| <b>3a</b> | C <sub>10</sub> H <sub>13</sub> NO <sub>2</sub> S (211.28) | 56.85 | 6.20 | 6.63 |  | 57.07 | 6.22 | 6.65 |
| <b>3b</b> | C <sub>14</sub> H <sub>15</sub> NO <sub>2</sub> S (261.34) | 64.34 | 5.79 | 5.36 |  | 64.59 | 5.81 | 5.38 |
| <b>4a</b> | C <sub>13</sub> H <sub>15</sub> NO <sub>2</sub> (217.26)   | 71.87 | 6.96 | 6.45 |  | 72.15 | 6.98 | 6.47 |
| <b>4b</b> | C <sub>14</sub> H <sub>17</sub> NO <sub>2</sub> (231.29)   | 72.70 | 7.41 | 6.06 |  | 72.99 | 7.43 | 6.08 |
| <b>4c</b> | C <sub>14</sub> H <sub>15</sub> NO <sub>4</sub> (261.27)   | 64.36 | 5.79 | 5.36 |  | 64.61 | 5.81 | 5.38 |
